# Supplementary material for: Understanding the amino ↔ imino tautomeric preference in (imidazole)imidazolidine-N-aryl(alkyl) systems: a case study of moxonidine drug and insights from the Cambridge structural database (CSD)
Source: Royal Society of Chemistry journal article supplement (doi:10.1039/c4ce01541j), 2014-01-01
Supplement: c4ce01541j1.pdf [file c4ce01541j1.pdf]

## Electronic Supplementary Information

### **Understanding the amino ↔ imino tautomeric preference in (imidazole)imidazolidine-N-aryl(alkyl) systems: a case study of moxonidine drug and insights from Cambridge Structural Database (CSD).**

Jagadeesh Babu Nanubolu,\*<sup>a</sup> Balasubramanian Sridhar,<sup>a</sup> Krishnan Ravikumar\*<sup>a</sup>

<sup>a</sup>Centre for X-ray Crystallography, CSIR-Indian Institute of Chemical Technology, Hyderabad, India, 500607. E-mail: [jagadeesh81@gmail.com](mailto:jagadeesh81@gmail.com) and [sshiya@yahoo.com](mailto:sshiya@yahoo.com)

**Table S1.** Sorting of 180 structures from CSD into 107 amino tautomers and 72 imino tautomers.

#### **107 structures represented as Amino Tautomer**

ABPHAK10, ABUSUN, ADANAV, AFURBA, AHOXOL, ASOSUX, AYATEA, AZELIB, BEWLOF, BOCYOH, BOCZIC, BOGFUZ, BOGREV, CAFNOO, CIVRUV, COJXEE, DEMDAB, DIDWOE, ECATOT, ECATUZ, ECAVAH, ECAVEL, EDEFUP, EFECAT, EFECEX, EPAJEL, EYAMIB, EYUJEO, FUBQEY, GOLFUI, HACJUR, HEDVAP, HEXBAO, HORDEX, HORFID, HORFOJ, HORFUP, IRITAF, JAZMON, JOQNUY, KEQZUC, KUXJOC, LAHQES, LERTIL, LIGSUP, MACPIM, MAFRIW, MAFROC, MAJRAS, MAVYUE, MILGUK, MILHAR, MILHEV, MUJKAE, MUZBAL, NEFRUM, NEHPAS, NEHPEW, NUQBAD, NUZJOH, PERLAA, PIBPEX, PIDJOD, PIDJUJ, PIDKAQ, PIDKEU, PUYDET, QABDON, QEQXIT, REFREB, REJVEI, SACZAX, SAGQEW, SIZFIQ, SUKNAN, TASWEP, TORNAQ, UBIJOE, UBIJUK, UCUZID, ULIJIJ, UNUMEW, VAHXOR, VEHDUH, VERZEY, VEVPOD, VIHJUR, VOBLAZ, WEFQAB, WEKKON, WIBMIE, WIPBAY, XASWUL, XENKAD, XIBPOO, XOZCUL, XUDNOA, XUDNUG, XUDPAO, XUQTOT, YEDTUX, YEYNEW, YUHBUY, YULGIW, ZENREP, ZIKPAK, ZIKPEO

#### **73 structures represented as Imino Tautomer**

ADAKUM, AKIWUM, ALALEF, BABBUB, BAFMUS, BAFNAZ, CIQNOG, CNHYDM, COPZOX, EKELAH, GEMMAN01, GENSUO, GIXYUI, GIXZIX, GOLNIE, HACJOL, HANFOS01, HIGGOU, HODQOG, HODSUO, IQAFEL, KABFID, KATVAC, KATXIO, KEPDUF, KEPFAN, KEPFER, KEQGET, KIBRAO, LUVPOH, MECVAT, MECVEX, MEYWOC, MITBOH, MOKKAZ, MUFBUK, MUZBIT, NATGUL, PAQQED, PIBGOY, QIBBOS, QIQDEB, QOQOS, QOTVAW, RUGGIK, SEDZUW, SEFBAG, SIMGUR, SINNAE, SIZSAW, SUTWIO, TAKXAG, TAKXEK, TAKXIO, TIAMEN10, TORNEU, TURVOR, UBIJIY, VEHFAP, VIGRIN, VOVCUE, XAQNOU, XEBQOM, XERHOS, XUDPES, YAKSIN, YIQZAA, ZAYQOF, ZEKPEM, ZEKPIQ, ZEKPOW, ZEKPOW01, ZIFKEG

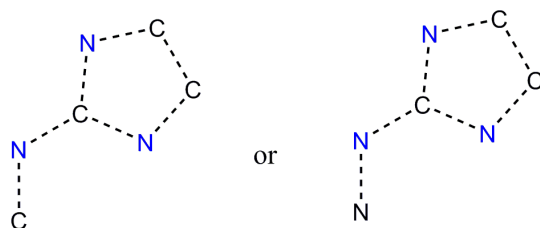

Dashed lines represent "any" bond

**Figure S1.** Two fragments are used for querying into Cambridge Structural Database, Conquest version 1.16, CSD version 5.35 (Nov 2013 release) + 2 updates (Nov 2013 + Feb 2014). Filters applied are 3D coordinates, No error, No polymeric, No powder and only organics to extract 827 hits. Ionic structures are excluded to leave 640 hits. Structures were manually analyzed for systems which can tautomerize. 180 hits are obtained.

Category (i)

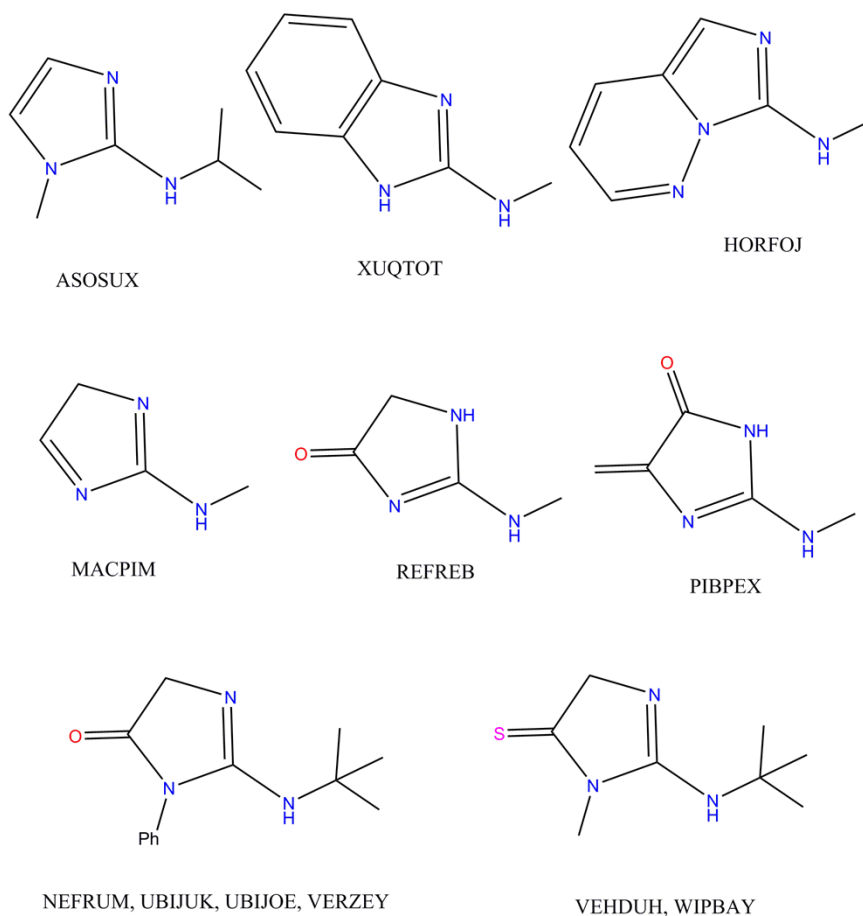

**Figure S2.** Various conjugated fragments observed in category (i) structures.

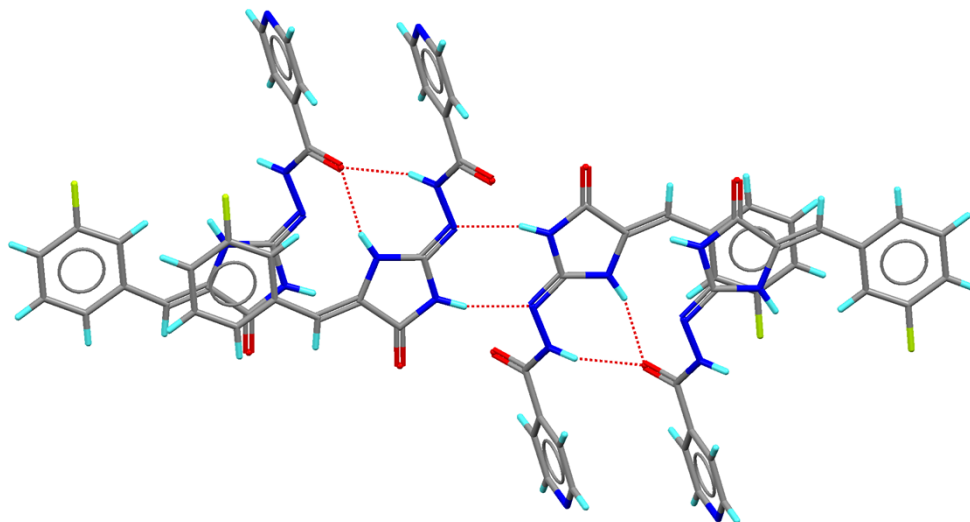

**Figure S3.** XUDPES structure crystallizes as imino tautomer and allows infinite chain of bifurcated N-H...O interactions and N-H...N dimers in the crystal

**Category (ii)**

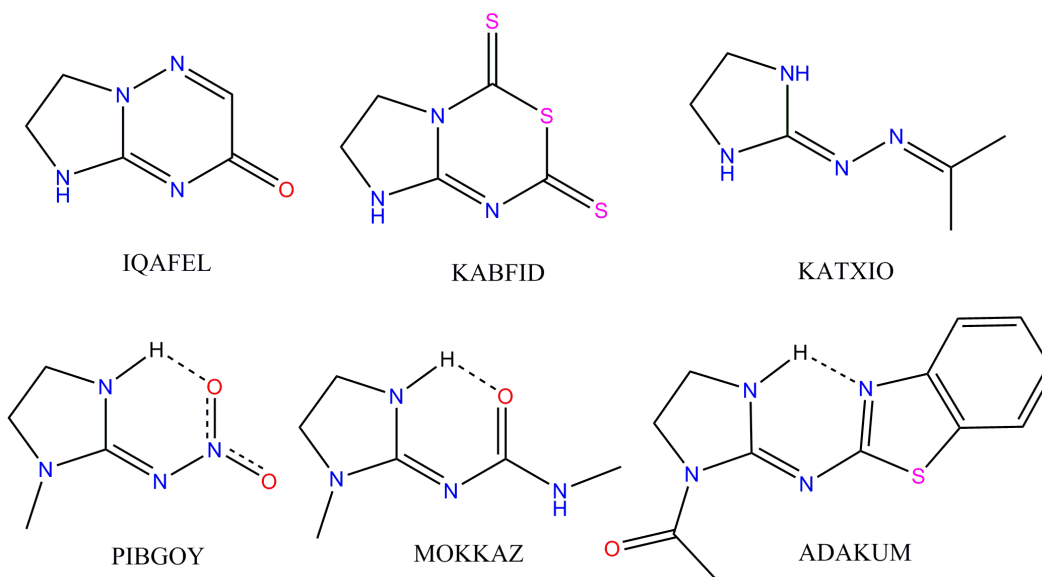

**Figure S4.** Various conjugated fragments noticed in category (ii) structures.

### Category (ii)

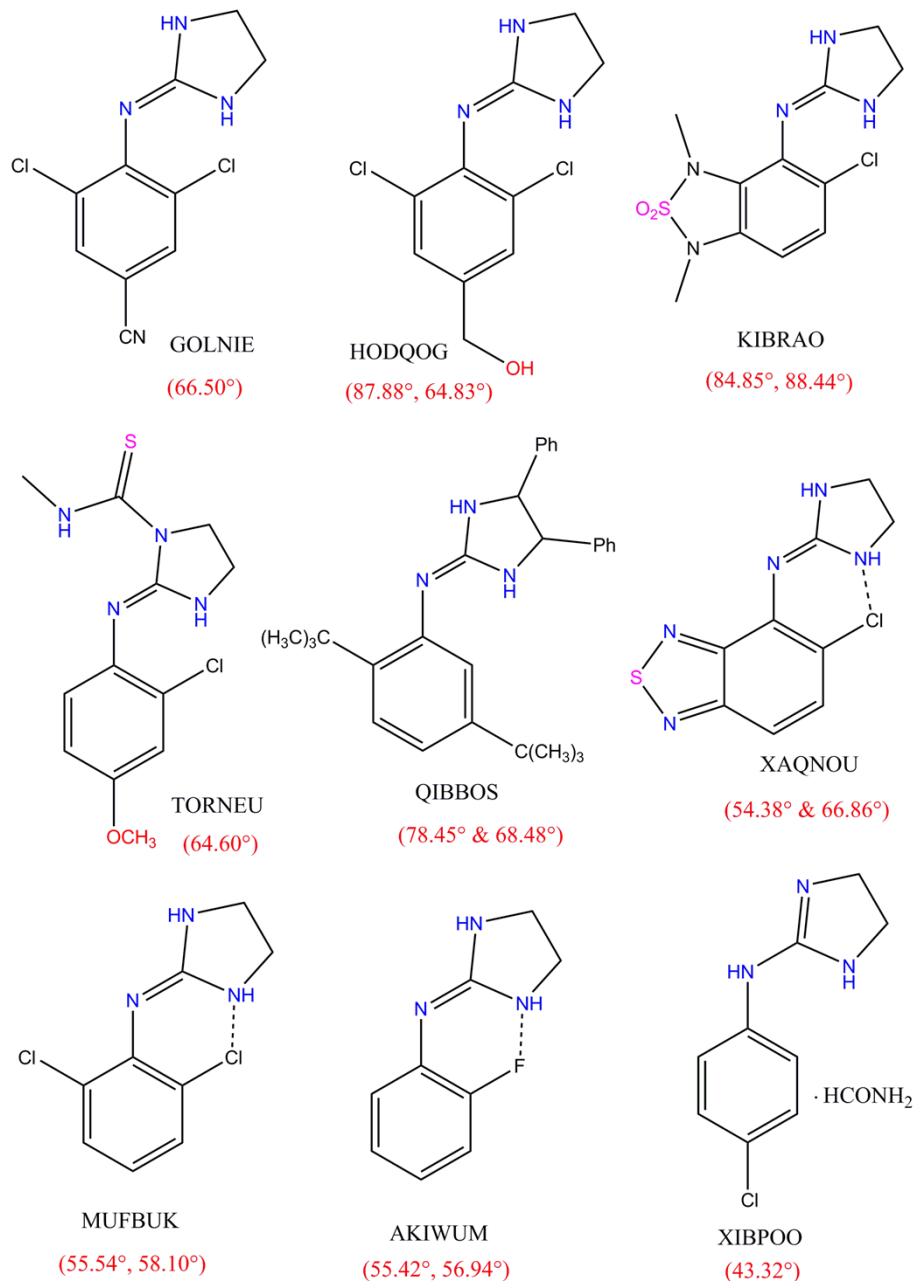

**Figure S5.** Nine structures in category (ii) which have close resemblances to moxonidine and all of them crystallize as imino tautomer except XIBPOO. Dihedral angles between planes of aromatic and imidazolidine ring are provided. Two values are provided for structures with two molecules in the asymmetric unit.

Category (ii)

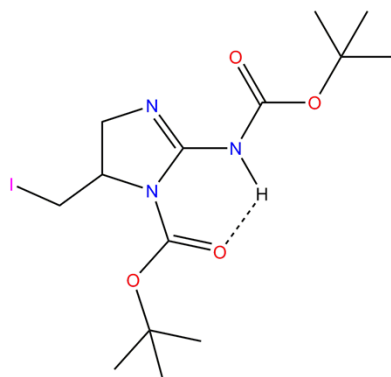

HACJUR, Amino tautomer

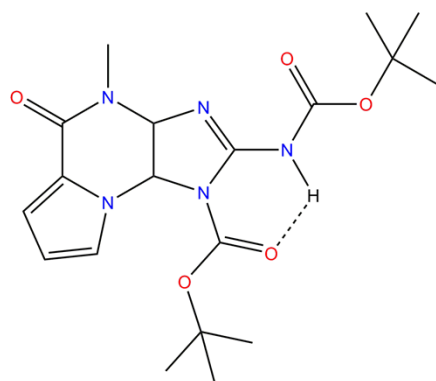

AHOXOL, Amino tautomer

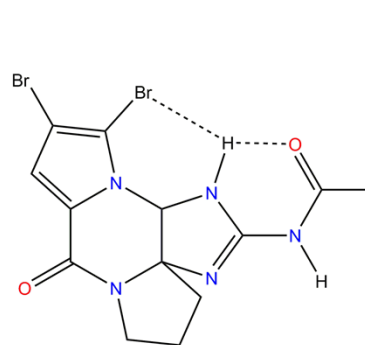

ABPHAK10, Amino tautomer

**Figure S6.** Molecular diagrams of three exceptional structures in category (ii). Intramolecular N-H...O hydrogen bonds stabilizing the amino tautomers are shown.

Category (iii)

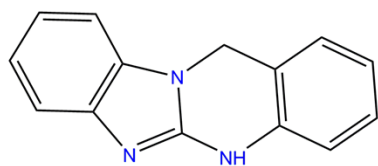

LIGSUP

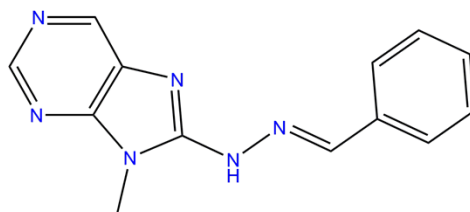

HEXBAO

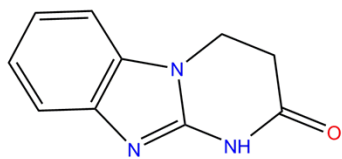

BOGREV

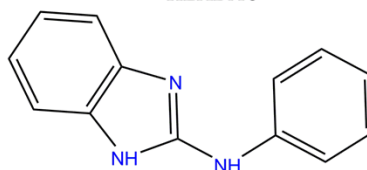

ABUSUN

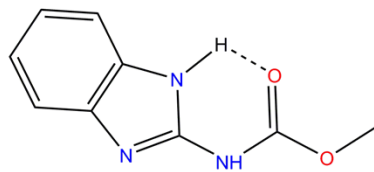

PIDJOD

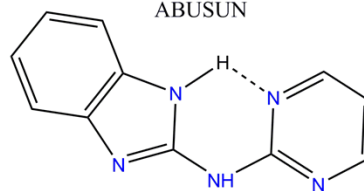

ULIJJ

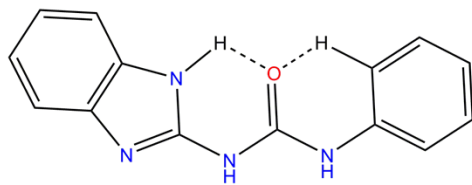

ECATOT

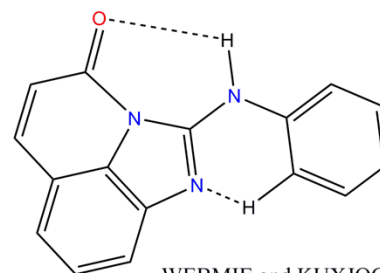

WEBMIE and KUXJOC

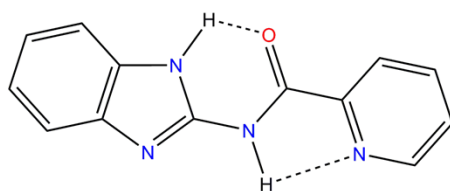

MILHAR

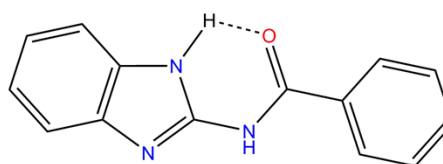

XENKAD

(a)

Category (iii)

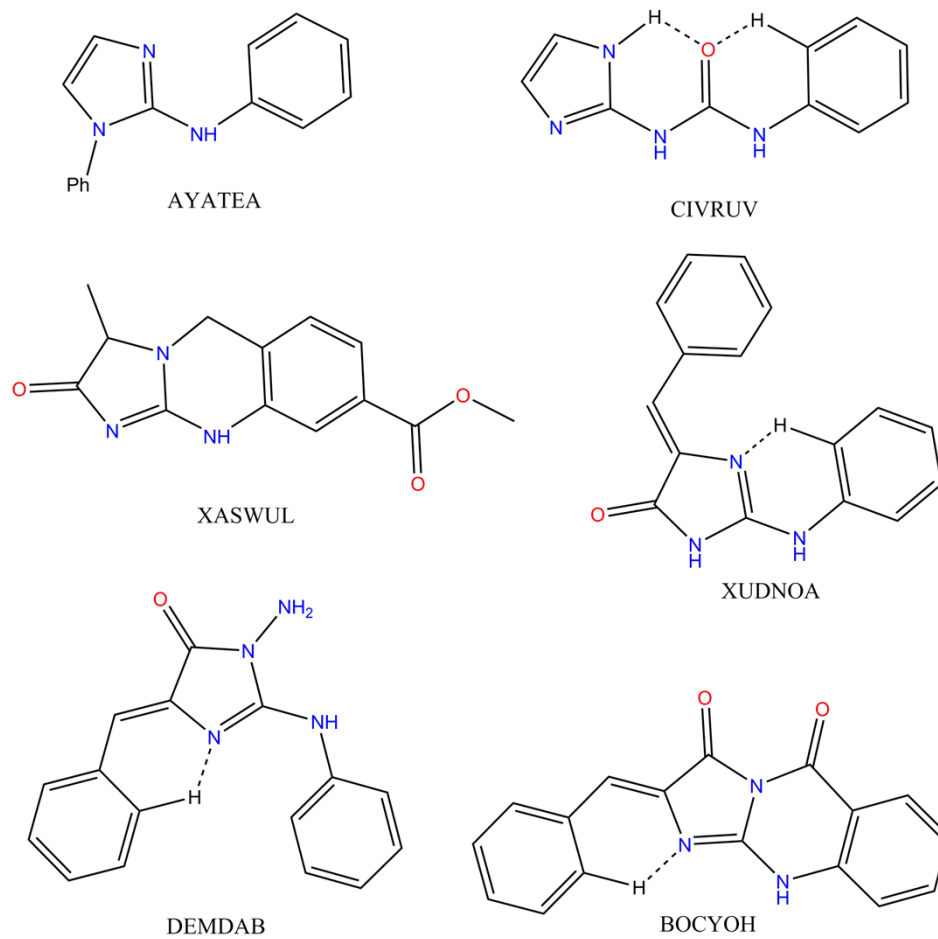

(b)

**Figure S7.** Category (iii) structures which crystallized as amino tautomers are shown in (a) and (b).

Category (iii)

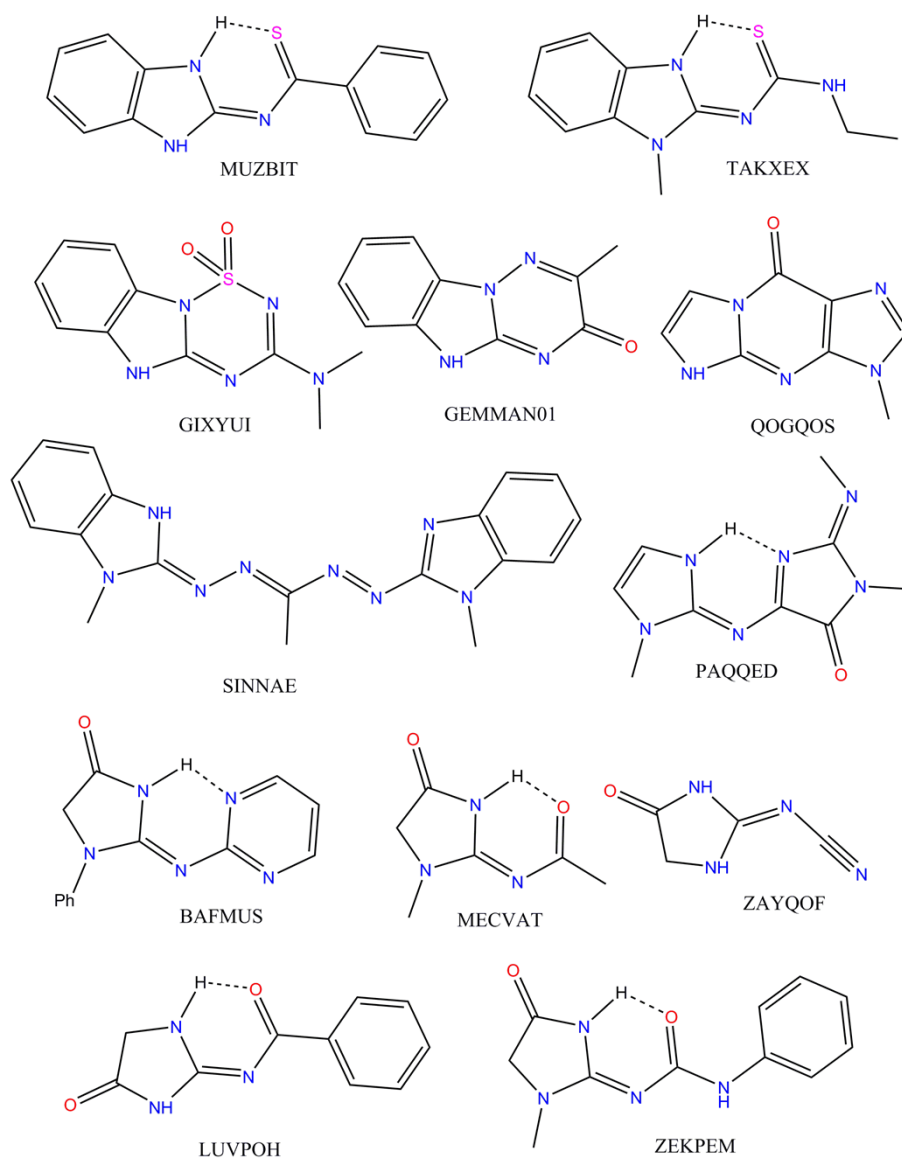

Figure S8. Category (iii) structures which crystallized as imino tautomers.



Category (iv)

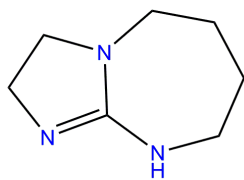

PERLAA

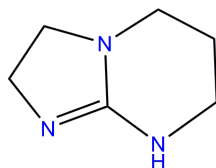

REJVEI

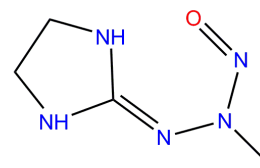

CNHYDM

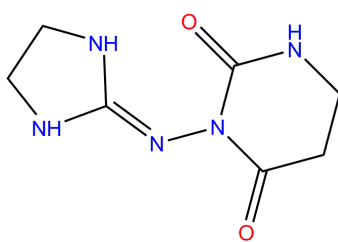

ZIFKEG

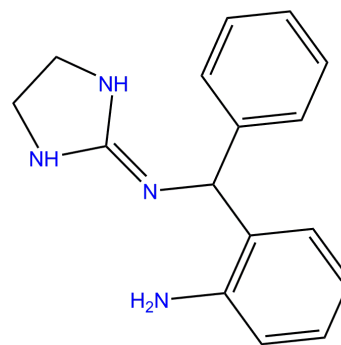

XERHOS

**Figure S9.** Category (iv) structures which crystallized as both amino and imino tautomer.

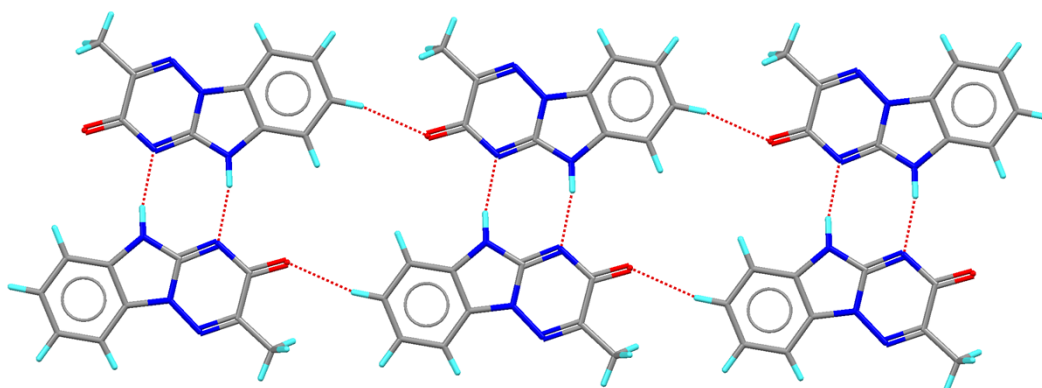

(a)

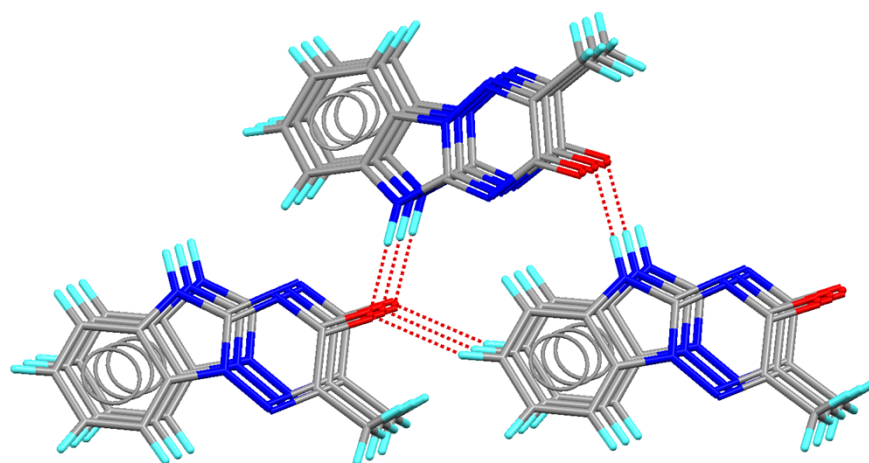

(b)

**Figure S10.** (a) Hydrogen bonding features leading to planar structure in GEMMAN. (b) Hydrogen bonding features leading to helical architecture in GEMMAN01 (polymorph). Both structures contain the less stable imino tautomer.

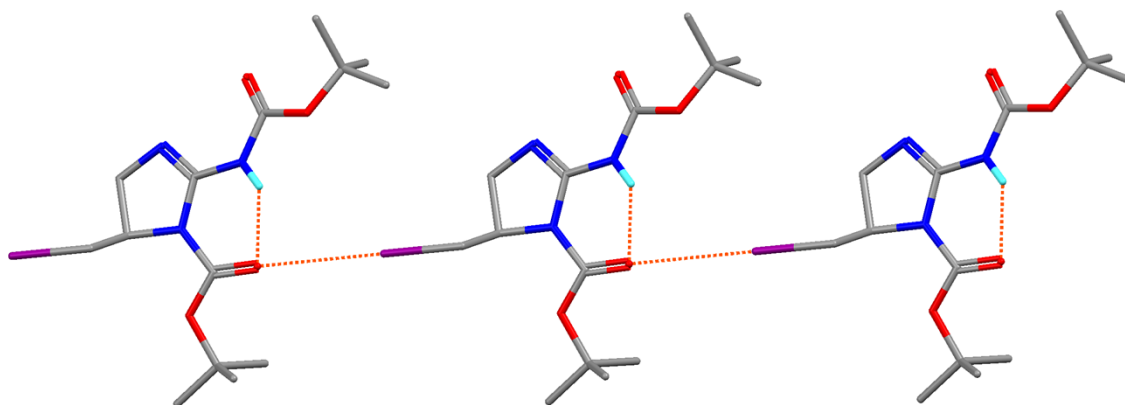

(a)

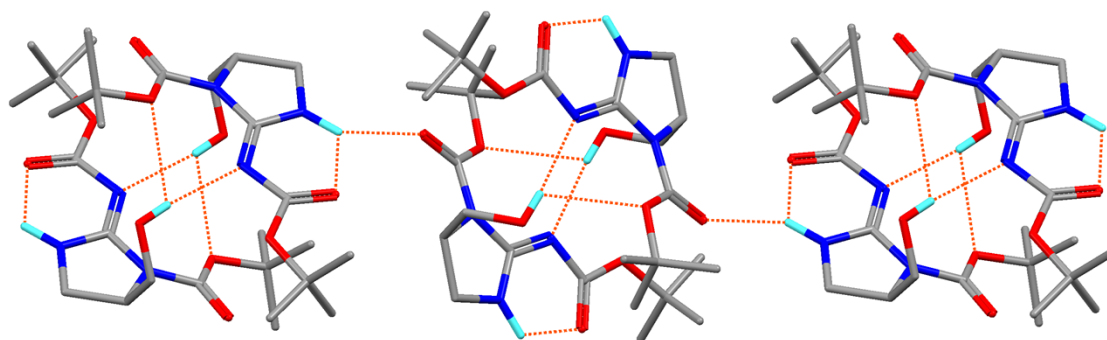

(b)

**Figure S11.** (a) Propagation of molecules in HACJUR crystal structure through short I...O contacts. (b) Interaction of hydroxyl groups with imino tautomer of HACJOL by O-H...N hydrogen bonds and propagation of molecules in the crystal through N-H...O hydrogen bonds.
